# 1 Poor antibody response to BioNTech/Pfizer COVID-19 vaccination 2 in SARS-CoV-2 naïve residents of nursing homes

3

## 4 ***Authors list***

5 Pieter Pannus<sup>1,‡</sup>, Ph.D., Kristof Y Neven<sup>1,‡</sup>, Ph.D., Stéphane De Craeye<sup>2</sup>, Ph.D., Leo Heyndrickx<sup>3</sup>,  
6 M.Sc., Sara Vande Kerckhove<sup>2</sup>, M.Sc., Daphnée Georges<sup>4,5</sup>, M.Sc., Johan Michiels<sup>3</sup>, B.Sc., Antoine  
7 Francotte<sup>2</sup>, M.Sc., Marc Van Den Bulcke<sup>1</sup>, Ph.D., Maan Zrein<sup>6</sup>, PhD, Steven Van Gucht<sup>2</sup>, Ph.D., Marie-  
8 Noëlle Schmickler<sup>7</sup>, M.D., Mathieu Verbrugghe<sup>7</sup>, Ph.D., André Matagne<sup>5</sup>, Ph.D., Isabelle Thomas<sup>2</sup>,  
9 Ph.D., Katelijne Dierick<sup>2</sup>, D.M.V., Joshua A. Weiner<sup>8</sup>, Ph.D., Margaret E. Ackerman<sup>8</sup>, Ph.D., Stanislas  
10 Goriely<sup>4</sup>, M.D., Maria E Goossens<sup>1,\*</sup>, M.D., Kevin K. Ariën<sup>3,9,\*</sup>, Ph.D., Isabelle Desombere<sup>2,\*</sup>, Ph.D.,  
11 Arnaud Marchant<sup>4\*</sup>, M.D.

12

13 ‡ P. P. and K. Y. N. contributed equally to this article.

14 \* M.E.G., K.K.A., I.D. and A.M. contributed equally to this article.

15

## 16 ***Authors affiliations***

17 1 SD Epidemiology and Public Health, Sciensano, Anderlecht, Belgium.

18 2 SD Infectious Diseases in Humans, Sciensano, Ukkel, Belgium.

19 3 Virology Unit, Department of Biomedical Sciences, Institute of Tropical Medicine, Antwerp, Belgium.

20 4 Institute for Medical Immunology and ULB Center for Research in Immunology (U-CRI), Université  
21 libre de Bruxelles (ULB), Gosselies, Belgium.

22 5 Laboratory of Enzymology and Protein Folding, Centre for Protein Engineering, InBioS, University of  
23 Liège, Liège, Belgium.

24 6 InfYnity Biomarkers, Lyon, France.

25 7 Mensura EDPB, Occupational Health Service, Antwerp, Belgium.

26 8 Thayer School of Engineering, Dartmouth College, Hanover, NH 03755 USA.

27 9 Department of Biomedical Sciences, University of Antwerp, Antwerp, Belgium.

28

## 29 ***Keywords***

30 COVID-19; mRNA vaccination; antibody response; nursing homes; immunosenescence

31 ***Running title***

32 COVID-19 vaccination in nursing homes

33

34 ***Summary***

35 Poor antibody responses to COVID-19 mRNA vaccination were observed in SARS-CoV-2 infection  
36 naïve residents and some naïve staff members of nursing homes. This suggests suboptimal protection  
37 against breakthrough infection, especially with variants of concern, and the need for adapted  
38 vaccination regimens.

39

40 ***Corresponding author***

41 Arnaud Marchant, Institute for Medical Immunology, Campus Erasme, 808 Route de Lennik, 1070  
42 Bruxelles, Belgium. Email: [arnaud.marchant@ulb.be](mailto:arnaud.marchant@ulb.be)

43

44 ***Alternate corresponding author***

45 Pieter Pannus, SD Epidemiology and Public Health, Sciensano, 1 Blerotstraat, 1070 Anderlecht,  
46 Belgium. Email: [pieter.pannus@sciensano.be](mailto:pieter.pannus@sciensano.be)

47 **Abstract**

48 **Background**

49 Residents of nursing homes (NH) are at high risk of COVID-19 related morbidity and death and may  
50 respond poorly to vaccination because of old age and frequent comorbidities.

51

52 **Methods**

53 Forty residents and forty staff members either naïve or previously infected with SARS-CoV-2 were  
54 recruited in two NH in Belgium before immunization with two doses of 30µg BNT162b2 mRNA vaccine  
55 at day 0 and day 21. Binding antibodies (Ab) to SARS-CoV-2 receptor binding domain (RBD), spike  
56 domains S1 and S2, RBD Ab avidity, and neutralizing Ab against SARS-CoV-2 wild type and B.1.351  
57 variant were assessed at days 0, 21, 28, and 49.

58

59 **Results**

60 SARS-CoV-2 naïve residents had lower Ab responses to BNT162b2 mRNA vaccination than naïve  
61 staff. These poor responses involved lower levels of IgG to all domains of the vaccine antigen, lower  
62 avidity of RBD IgG, and lower levels of Ab neutralizing the vaccine strain. No naïve resident had  
63 detectable neutralizing Ab to the B.1.351 variant. High and comparable Ab responses were observed  
64 in residents and staff previously infected with SARS-CoV-2. Clustering analysis revealed that poor  
65 vaccine responders not only included naïve residents but also naïve staff, emphasizing the  
66 heterogeneity of responses to mRNA vaccination in the general population.

67

68 **Conclusions**

69 The poor Ab responses to mRNA vaccination observed in infection naïve residents and in some naïve  
70 staff members of NH suggest suboptimal protection against breakthrough infection, especially with  
71 variants of concern. Adapted vaccination regimens may be needed to provide optimal protection  
72 against COVID-19 to vulnerable populations.

## 73 Introduction

74 Residents of nursing homes (NH) are at a disproportionately high risk of COVID-19 related morbidity  
75 and mortality, representing about 5% of all cases while accounting for >30% of all COVID-19 related  
76 deaths in the United States [1,2]. Vaccination campaigns around the world have therefore generally  
77 prioritized NHs, achieving high coverage rates especially among residents [3,4]. As a result, new  
78 cases and deaths have declined steeply in such facilities, outpacing national rates [5–7].

79

80 The success of COVID-19 mRNA vaccination in NH is consistent with data from phase 2 studies  
81 indicating potent immunogenicity of these vaccines in younger and older adults [8,9]. However, recent  
82 observational studies have found lower antibody (Ab) responses to BNT162b2 vaccination in older  
83 adults [10–12]. In addition, chronic comorbidities such as type 2 diabetes and cardiovascular disease  
84 were associated with lower vaccine responses [11,13]. These data raise the concern that NH  
85 residents, who are old, frail, and often have comorbidities, might respond more poorly to COVID-19  
86 vaccination. Supporting this concern, a retrospective observational cohort study from Denmark found  
87 lower vaccine effectiveness in NH residents (64%) as compared to healthcare workers (90%) one  
88 week after the second dose of BNT162b2 mRNA vaccination [14].

89

90 Decreased efficacy of COVID-19 vaccination in NH residents may be particularly problematic in the  
91 face of emerging SARS-CoV-2 variants that are less susceptible to vaccine-induced neutralizing Ab  
92 [15–17]. Breakthrough infections with SARS-CoV-2 variants following complete mRNA vaccination  
93 have been reported in healthy adults and more recently, severe COVID-19 and death have been  
94 reported following an outbreak of the SARS-CoV-2 R.1 variant in a NH in Kentucky [18,19]. The  
95 concern of severe breakthrough infection with SARS-CoV-2 variants may be lower in NH residents  
96 who have survived natural infection. Indeed, COVID-19 mRNA vaccination induces higher Ab  
97 responses in previously infected adults as compared to infection naïve adults and boosts neutralizing  
98 Ab cross-reacting with variants of concern [20–25]. The level of cross-reactive immunity induced by  
99 mRNA vaccination in naïve and previously infected NH residents is currently unclear.

100

101 Taken together, available data raise concern regarding immunity induced by current COVID-19 mRNA  
102 vaccine regimens in infection naïve and frail NH residents, especially in the current context of  
103 emerging SARS-CoV-2 variants. We therefore established a longitudinal cohort of SARS-CoV-2 naïve

104 or previously infected NH residents and staff who received two doses of the BNT162b2 mRNA vaccine  
105 and assessed the magnitude and quality of Ab responses to SARS-CoV-2 Wuhan (wild type, WT) and  
106 B.1.351, first identified in South Africa, as a prototype variant of concern.

107

## 108 **Material and methods**

### 109 **Study design and approvals**

110 This study is nested in a prospective cohort study named PICOV (Prior Infection with SARS-CoV-2)  
111 [26]. The objective of this nested study was to measure the immune response to SARS-CoV-2 mRNA  
112 vaccination in naïve and previously infected residents and members of staff. The study was approved  
113 by the Ethics Committee of the Hôpital Erasme, Brussels, Belgium (reference B4062020000134), the  
114 Federal Agency for Medicines and Health Products (2021-000401-24), and is registered on  
115 ClinicalTrials.gov (NCT04527614).

116

### 117 **Recruitment and clinical sample collection**

118 SARS-CoV-2 infection-naïve and previously infected residents and staff from two Belgian NHs were  
119 recruited. Those with a documented positive RT-qPCR or serological test result at baseline were  
120 considered to be previously infected with SARS-CoV-2. Main exclusion criteria for NH residents  
121 included a previous diagnosis of dementia, a mini-mental state examination (MMSE) score  $\leq 18/30$ ,  
122 and life expectancy  $< 6$  months. As described previously, scores from the Clinical Frailty Scale (CFS)  
123 and Quality of Life (QoL) were determined for residents at baseline [26].

124

125 All subjects were immunized with two doses of 30 $\mu$ g BNT162b2 mRNA from BioNTech/Pfizer  
126 (Comirnaty®), 21 days apart. Blood samples were collected on the day of the primary dose (baseline  
127 or day 0), the day of the boost (day 21) as well as one and four weeks after the boost (respectively  
128 day 28 and day 49). Serum was separated by blood centrifugation at 1000g for 10 minutes and stored  
129 at -20°C for downstream Ab analyses.

130

### 131 **SARS-CoV-2-Specific Binding Antibodies**

132 Levels of serum Ab were assessed using a multiplexed immunoassay (Multi-SARS-CoV-2  
133 Immunoassay), developed in collaboration with InfYnity Biomarkers (Lyon, France). In this microarray,  
134 SARS-CoV-2 antigens, selected for their individual performance, were printed in 96-well polystyrene

135 microplates using a sciFLEXARRAYER printing system (Scienion, Germany). Individual SARS-CoV-2  
136 antigens, including Spike 1 domain (S1, encompassing AA16-685 of S), Spike 2 domain (S2,  
137 encompassing AA686-1213 of S), and Receptor Binding Domain (RBD), were printed in duplicate  
138 (GenBank YP009724390.1). Serial dilutions of test samples as well as positive and negative control  
139 sera were incubated in microarray plates for 1h at room temperature (RT) and washed with  
140 phosphate-buffered saline with 0.05% Tween 20 (PBST). Next, plates were incubated (1h, RT) with  
141 horseradish peroxidase-conjugated goat anti-human IgG and washed with PBST before adding a  
142 precipitating TMB solution for 20min (RT, dark). Then, TMB was removed and plates were dried at  
143 37°C for 10min. Microplates were imaged and analyzed using a microplate reader (SciReader CL,  
144 Scienion, Germany). The average pixel intensity for each spot was calculated for each antigen/dilution  
145 and reported as net intensity. The dynamic range of each antigen measurement was defined using  
146 serial dilutions of positive sera. Only antigen measurements within the dynamic range were  
147 considered and were multiplied by the dilution factor. For each serum, quantitative results were eligible  
148 if at least 2 dilutions report comparable results (%CV<28%). Results are reported as arbitrary pixel  
149 units per milliliter (AU/ml). ROC-analyses using an independent population for validation generated  
150 cutoff concentrations of 21.0 AU/ml, 19.5 AU/ml and 19.5 AU/ml for RBD, S1 and S2, respectively  
151 (**Supplementary methods**).

152

### 153 **SARS-CoV-2 Neutralizing Antibodies**

154 Serial dilutions of heat-inactivated serum (1/50-1/25600 in EMEM supplemented with 2mM L-  
155 glutamine, 100U/ml - 100µg/ml of Penicillin-Streptomycin and 2% fetal bovine serum) were incubated  
156 during 1h (37°C, 7% CO<sub>2</sub>) with 3xTCID<sub>50</sub> of (i) a wild type (WT) Wuhan strain (2019-nCoV-Italy-  
157 INMI1, reference 008V-03893) and (ii) the B.1.351 variant of SARS-CoV-2, in parallel. Sample-virus  
158 mixtures and virus/cell controls were added to Vero cells (18.000 cells/well) in a 96-well plate and  
159 incubated for five days (37°C, 7% CO<sub>2</sub>). The cytopathic effect caused by viral growth was scored  
160 microscopically. The Reed-Muench method was used to calculate the neutralizing Ab titer that  
161 reduced the number of infected wells by 50% (NT<sub>50</sub>), which was used as a proxy for the neutralizing  
162 Ab concentration in the sample [27].

163

### 164 **SARS-CoV-2 RBD-Specific antibody avidity**

165 Bio-layer interferometry measurements were performed with an Octet HTX instrument (Fortébio) using  
166 AR2G biosensors. Data analyses were performed using FortéBio Data Analysis 9.0 software. Kinetic  
167 assays were performed at 25-30°C at a sample plate agitation speed of 1000rpm. Sensors were first  
168 activated by immersion in a solution containing 20mM EDC and 10mM s-NHS. Then, 0.05mg/ml of  
169 RBD antigen in 10mM sodium acetate pH 6 was loaded for 600sec. After antigen loading, the  
170 biosensors were immersed in a solution of 1M ethanolamine pH8.5 to prevent non-specific  
171 interactions. Antigen loaded AR2G sensors were first dipped in PBS to establish a baseline time  
172 curve, and then immersed for 10min in wells containing purified serum IgG at three different dilutions  
173 (3-5-8x). Following IgG association, dissociation was monitored for 600sec in PBS. Negative controls  
174 included ligand without IgG and IgG without ligand. Kinetic parameters were determined by global  
175 fitting of the association and dissociation phases of the binding curves according to a 1:1 binding  
176 model.

177

#### 178 **Statistical analyses**

179 Analyses were performed in R (version 4.0.3). Categorical data were presented as frequencies and  
180 percentages, continuous data as means (SD). The Kruskal-Wallis test and post-hoc Mann-Whitney U  
181 test alongside multiple testing correction with the false discovery rate were used for all time wise group  
182 comparisons. The Mann-Whitney test was used to compare WT and B.1.351 variant neutralizing Ab at  
183 day 49. Spearman's rank correlation coefficients ( $\rho$ ) were determined for associations between  
184 WT and B.1.351 variant neutralizing Ab, SARS-CoV-2 binding Ab, and Ab avidity.

185

186 A Uniform Manifold Approximation and Projection (UMAP) analysis was performed using the R  
187 package "umap" for dimensionality reduction of the following outcomes at day 49: anti-RBD/S1/S2  
188 IgG, anti-RBD IgG avidity, and WT NT50. To achieve normality, avidity was  $\log_{10}$  and neutralization  
189  $\log_2$  transformed. The optimal number of clusters was tested via the k-means (range 1:10) and visually  
190 identified with an "elbow" in a plot of variance versus number of clusters. DBSCAN ("dbscan" package)  
191 identified clusters within the UMAP reduced dimensions.

192

#### 193 **Results**

194 The study included 40 residents and 40 members of staff who were either naïve or previously infected  
195 with SARS-CoV-2 before they received 2 x 30µg BNT162b2 mRNA vaccine at their respective NH. In

196 previously infected subjects, SARS-CoV-2 infection occurred between 269 and 315 days before  
197 vaccination. Complete cohort and demographic information is provided in **Table 1**. Although residents  
198 with the poorest health status were excluded, most enrolled residents were frail and many suffered  
199 multiple co-morbidities requiring medication.

200

201 Levels of binding Ab to SARS-CoV-2 spike receptor binding domain (RBD), spike subunit domains  
202 one (S1) and two (S2) were measured in longitudinal serum samples using a multiplex immunoassay.  
203 Detailed numerical data are presented in **Tab.S1**. At baseline, naïve staff and residents had  
204 undetectable levels of SARS-CoV-2-specific IgG whereas high levels of Ab were detected in  
205 previously infected subjects (**Fig.1a, Fig.S1**). Primary vaccination induced a significant increase in  
206 SARS-CoV-2 Ab in naïve as well as previously infected staff and residents, and Ab levels were further  
207 boosted following secondary vaccination at day 21 (**Fig.1a**). Vaccine-induced Ab levels to RBD and  
208 S1 were about six-fold lower in naïve residents as compared to naïve staff following primary  
209 vaccination and two-fold lower after booster vaccination (**Fig.1b**). In comparison to naïve subjects, Ab  
210 levels were strongly increased in both residents and staff previously infected with SARS-CoV-2  
211 (**Fig.1b and Fig.S1**). Among previously infected subjects, residents had higher Ab responses to RBD  
212 and S1 as compared to staff. Ab responses to S2 were lower than responses to RBD and S1,  
213 especially in naïve subjects.

214

215 The avidity of RBD-specific Ab was measured using bio-layer interferometry. Rapid avidity maturation  
216 was observed after primary vaccination in naïve and previously infected staff (**Fig.2a**). High RBD IgG  
217 avidity was also observed in previously infected residents at day 21, whereas avidity could only be  
218 assessed in few naïve residents who had sufficiently high levels of RBD Ab to be characterized  
219 (**Fig.2a**). Following booster vaccination, RBD IgG avidity further increased in naïve staff and residents,  
220 but remained stable in previously infected subjects (**Fig.2a**). Four weeks after booster vaccination (day  
221 49), Ab avidity was significantly higher in naïve staff as compared to naïve residents, and was higher  
222 in previously infected subjects as compared to naïve subjects (**Fig.2b**).

223

224 The lower levels and avidity of vaccine-induced Ab observed in naïve residents as compared to naïve  
225 staff suggested lower neutralizing Ab capacity. To explore this possibility, titers of neutralizing Ab  
226 against WT Wuhan strain and B.1.351 variant were measured. Previously infected staff and residents



227 had detectable neutralizing Ab to the Wuhan strain at baseline and these titers further increased by  
228 primary and booster vaccinations (**Fig.2c**). Potent neutralizing Ab responses were also induced by  
229 vaccination of naïve staff, although the proportion of subjects with detectable responses decreased  
230 between day 28 (18/19) and day 49 (14/19). In contrast, only 6/20 naïve residents had detectable  
231 neutralizing Ab at day 28 and this proportion increased to 9/20 at day 49 (**Fig.2c**). At day 49, naïve  
232 residents had significantly lower neutralizing Ab responses as compared to naïve staff, whereas  
233 higher responses were detected in previously infected subjects as compared to naïve subjects  
234 (**Fig.2d**). Compared to the wild type strain, neutralizing titers against the B.1.351 variant were reduced  
235 five to ten-fold across study groups (**Fig.2e**). In naïve subjects, only 2/19 staff and none of the naïve  
236 residents had detectable neutralizing Ab against the B.1.351 variant at day 49, whereas neutralizing  
237 Ab were detected in 19/21 previously infected staff and 18/20 previously infected residents.

238

239 The consistent differences in Ab responses observed between the four study groups suggested a  
240 coordinated response to mRNA vaccination across the measured immunological parameters. Indeed,  
241 titers of neutralizing Ab against the wild type strain strongly correlated with RBD, S1 and S2 binding  
242 Ab, RBD IgG avidity, and neutralizing Ab to the B.1.351 variant (**Fig.2f**).

243

244 To further explore inter-individual variability of this coordinated response, a clustering analysis was  
245 performed to reduce the complete dataset to two dimensions and identify groups of subjects who have  
246 similar profiles of Ab responses. Five clusters of study participants with distinct Ab levels, avidity, and  
247 neutralizing activity at day 49 were identified (**Fig.3a-d**). These clusters were not correlated with age  
248 of the study participants (**Fig.3e**). Clusters 4 and 5 exclusively contained previously infected subjects  
249 with high Ab responses. Interestingly, cluster 5, including the highest Ab responses, was mostly  
250 composed of previously infected residents. In contrast, cluster 1, including the lowest Ab responses,  
251 was composed of a mix of naïve residents and naïve staff, indicating that both populations contain low  
252 responders to mRNA vaccination. Clusters 2 and 3 included intermediate Ab responses and were  
253 composed of a mix of naïve residents, naïve staff and some previously infected staff and residents.  
254 The clustering analysis therefore revealed a group of poor Ab responders that not only included naïve  
255 residents but also naïve staff.

256

257 **Discussion**

258 Reports on lower Ab responses to COVID-19 mRNA vaccination in older people and in people with  
259 chronic comorbidities raise concern about the susceptibility of NH residents to severe breakthrough  
260 infections, especially with SARS-CoV-2 variants of concern [10–13]. In this study, NH residents  
261 without previous SARS-CoV-2 infection had lower Ab responses to BNT162b2 mRNA vaccination as  
262 compared to naïve staff. These defective responses included lower levels of IgG to all domains of the  
263 vaccine antigen, lower avidity of RBD IgG and lower levels of neutralizing Ab. Worryingly, none of the  
264 naïve residents had detectable neutralizing Ab to the B.1.351 variant.

265

266 Although an immune correlate of protection against COVID-19 has not been established yet, levels of  
267 virus-specific binding and neutralizing Ab have been shown to correlate with vaccine efficacy in phase  
268 3 studies across different vaccination platforms [28]. In addition, data from pre-clinical studies on non-  
269 human primates indicate that mRNA vaccine-induced neutralizing Ab can mediate protection against  
270 disease [29–31]. The poor Ab responses observed in our study are therefore likely associated with  
271 lower vaccine-induced protection. Providing optimal protection to the vulnerable population of NH  
272 residents may require adapted vaccination regimens, such as additional doses of homologous or  
273 heterologous vaccines.

274

275 Both age and health status differentiate NH residents and staff. In this cohort, Ab responses were not  
276 strongly correlated with age, suggesting a more important role of health status, including frailty and  
277 comorbidities. This observation is consistent with the robust Ab responses to mRNA vaccination  
278 observed in older people with preserved health status and living outside NH [32]. In both residents and  
279 staff, previous SARS-CoV-2 infection was a major determinant of Ab responses, with markedly higher  
280 Ab levels and quality in previously infected as compared to naïve subjects. NH residents previously  
281 infected with SARS-CoV-2 had remarkably high Ab responses to mRNA vaccination and included the  
282 highest responders of the cohort. These high vaccine responses likely reflect potent immunological  
283 memory potentially induced by more severe infections and selected by survival after COVID-19 [33]. In  
284 marked contrast with naïve residents, NH residents previously infected with SARS-CoV-2 may be at  
285 particularly low risk of breakthrough infection following mRNA vaccination.

286

287 Another important finding of this study is that poor vaccine responders were not limited to naïve  
288 residents, but also included healthy naïve staff. This observation emphasizes the heterogeneity of Ab

289 responses to mRNA vaccination in the general population [34–36]. As mRNA vaccination has only  
290 recently been implemented in large populations, the immunological basis of this heterogeneity is  
291 currently unknown. Systems immunology, involving high dimensional analyses of the immune system,  
292 is emerging as a promising approach to identify determinants of vaccine responsiveness and has the  
293 potential to guide the development of next-generation mRNA vaccines against COVID-19 and other  
294 target pathogens [37,38].

295

296 Identifying vulnerable populations who may benefit less from current mRNA vaccination regimens is  
297 essential for the control of the COVID-19 pandemic. Adapted mRNA vaccination regimens may be  
298 required to protect SARS-CoV-2 naïve residents of NH and younger poor vaccine responders against  
299 breakthrough infections, especially with variants of concern.

300 **Acknowledgements**

301 We thank Caroline Rodeghiero, Fabienne Jurion, Elfriede Heerwegh, Giresse Tima, Elisa Brauns,  
302 Muriel Nguyen, Séverine Thomas, Vincent Martens, Valérie Acolty, Véronique Olislaghers, Inès Vu  
303 Duc, Betty Willems, Maria Lara Escandell, Sandra Coppens, Ann Ceulemans, Koen Bartholomeeusen  
304 and Marylène Vandevenne for their technical and logistical help in the laboratory. We thank Martine  
305 Delaere, Kristine Massez, Jody Serré, Nathalie Matia Sangrador and Elodie Glinne for their excellent  
306 and dedicated work as study nurses. We thank Dr. Piet Maes (Rega Institute, KU Leuven, Belgium) to  
307 kindly provide the B.1.351 SARS-CoV-2 isolate. Finally, we thank all residents and members of staff of  
308 the participating nursing homes for their availability, flexibility and dedication to the study. S.G. is  
309 Senior research Associate and A.M. is Research Director of the FRS-FNRS, Belgium.

310

311 **Financial support**

312 This work was supported by the Belgian Federal Government [COVID-19\_SC004, COVID-19\_SC049,  
313 COVID-19\_SC059]; the European Regional Development Fund of the Walloon Region (Wallonia-  
314 Biomed portfolio) [411132-957270]; and the Flemish Research Foundation [grant number FWO-  
315 G0G4220N to K. K. A.].

316

317 **Potential conflicts of interest**

318 The authors declare no conflicts of interest.

## 319 References

- 320 1. Werner RM, Hoffman AK, Coe NB. Long-Term Care Policy after Covid-19 - Solving the  
321 Nursing Home Crisis. *N Engl J Med* **2020**; 383:903–905.
- 322 2. Apr 23 P, 2021. State COVID-19 Data and Policy Actions. KFF. 2021; Available at:  
323 [https://www.kff.org/coronavirus-covid-19/issue-brief/state-covid-19-data-and-policy-](https://www.kff.org/coronavirus-covid-19/issue-brief/state-covid-19-data-and-policy-actions/)  
324 [actions/](https://www.kff.org/coronavirus-covid-19/issue-brief/state-covid-19-data-and-policy-actions/). Accessed 27 April 2021.
- 325 3. Dooling K. The Advisory Committee on Immunization Practices' Interim  
326 Recommendation for Allocating Initial Supplies of COVID-19 Vaccine — United States,  
327 2020. *MMWR Morb Mortal Wkly Rep* **2020**; 69. Available at:  
328 <https://www.cdc.gov/mmwr/volumes/69/wr/mm6949e1.htm>. Accessed 27 April 2021.
- 329 4. Gharpure R. Early COVID-19 First-Dose Vaccination Coverage Among Residents and  
330 Staff Members of Skilled Nursing Facilities Participating in the Pharmacy Partnership for  
331 Long-Term Care Program — United States, December 2020–January 2021. *MMWR*  
332 *Morb Mortal Wkly Rep* **2021**; 70. Available at:  
333 <https://www.cdc.gov/mmwr/volumes/70/wr/mm7005e2.htm>. Accessed 27 April 2021.
- 334 5. Conlen M, Mervosh S, Ivory D. Nursing Homes, Once Hotspots, Far Outpace U.S. in  
335 Covid Declines. *N. Y. Times*. 2021; Available at:  
336 <https://www.nytimes.com/interactive/2021/02/25/us/nursing-home-covid-vaccine.html>.  
337 Accessed 27 April 2021.
- 338 6. Britton A. Effectiveness of the Pfizer-BioNTech COVID-19 Vaccine Among Residents of  
339 Two Skilled Nursing Facilities Experiencing COVID-19 Outbreaks — Connecticut,  
340 December 2020–February 2021. *MMWR Morb Mortal Wkly Rep* **2021**; 70. Available at:  
341 <https://www.cdc.gov/mmwr/volumes/70/wr/mm7011e3.htm>. Accessed 29 April 2021.
- 342 7. Kuehn BM. Israel's Real-life Evidence That Vaccine Can Prevent Severe COVID-19.  
343 *JAMA* **2021**; 325:1603–1603.
- 344 8. Walsh EE, Frenck RW, Falsey AR, et al. Safety and Immunogenicity of Two RNA-  
345 Based Covid-19 Vaccine Candidates. *N Engl J Med* **2020**; 383:2439–2450.
- 346 9. Anderson EJ, Roupheal NG, Widge AT, et al. Safety and Immunogenicity of SARS-  
347 CoV-2 mRNA-1273 Vaccine in Older Adults. *N Engl J Med* **2020**; 383:2427–2438.
- 348 10. Predecki M, Clarke C, Brown J, et al. Effect of previous SARS-CoV-2 infection on  
349 humoral and T-cell responses to single-dose BNT162b2 vaccine. *Lancet Lond Engl*  
350 **2021**;
- 351 11. Müller L, Andrée M, Moskorz W, et al. Age-dependent immune response to the  
352 Biontech/Pfizer BNT162b2 COVID-19 vaccination. *Clin Infect Dis Off Publ Infect Dis*  
353 *Soc Am* **2021**;
- 354 12. Dagan N, Barda N, Kepten E, et al. BNT162b2 mRNA Covid-19 Vaccine in a  
355 Nationwide Mass Vaccination Setting. *N Engl J Med* **2021**;
- 356 13. Yelin I, Katz R, Herzel E, et al. Associations of the BNT162b2 COVID-19 vaccine  
357 effectiveness with patient age and comorbidities. *medRxiv* **2021**;  
358 :2021.03.16.21253686.
- 359 14. Moustsen-Helms IR, Emborg H-D, Nielsen J, et al. Vaccine effectiveness after 1st and  
360 2nd dose of the BNT162b2 mRNA Covid-19 Vaccine in long-term care facility residents

- 361 and healthcare workers – a Danish cohort study. medRxiv **2021**;  
362 :2021.03.08.21252200.
- 363 15. Chen RE, Zhang X, Case JB, et al. Resistance of SARS-CoV-2 variants to  
364 neutralization by monoclonal and serum-derived polyclonal antibodies. Nat Med **2021**;  
365 :1–10.
- 366 16. Wang P, Nair MS, Liu L, et al. Antibody Resistance of SARS-CoV-2 Variants B.1.351  
367 and B.1.1.7. Nature **2021**; :1–9.
- 368 17. Zhou D, Dejnirattisai W, Supasa P, et al. Evidence of escape of SARS-CoV-2 variant  
369 B.1.351 from natural and vaccine-induced sera. Cell **2021**; 184:2348–2361.e6.
- 370 18. Hacısuleyman E, Hale C, Saito Y, et al. Vaccine Breakthrough Infections with SARS-  
371 CoV-2 Variants. N Engl J Med **2021**; 0:null.
- 372 19. Teran RA. Postvaccination SARS-CoV-2 Infections Among Skilled Nursing Facility  
373 Residents and Staff Members — Chicago, Illinois, December 2020–March 2021.  
374 MMWR Morb Mortal Wkly Rep **2021**; 70. Available at:  
375 <https://www.cdc.gov/mmwr/volumes/70/wr/mm7017e1.htm>. Accessed 29 April 2021.
- 376 20. Manisty C, Otter AD, Treibel TA, et al. Antibody response to first BNT162b2 dose in  
377 previously SARS-CoV-2-infected individuals. Lancet Lond Engl **2021**; 397:1057–1058.
- 378 21. Krammer F, Srivastava K, Alshammary H, et al. Antibody Responses in Seropositive  
379 Persons after a Single Dose of SARS-CoV-2 mRNA Vaccine. N Engl J Med **2021**;  
380 384:1372–1374.
- 381 22. Stamatatos L, Czartoski J, Wan Y-H, et al. mRNA vaccination boosts cross-variant  
382 neutralizing antibodies elicited by SARS-CoV-2 infection. Science **2021**;
- 383 23. Samanovic MI, Cornelius AR, Wilson JP, et al. Poor antigen-specific responses to the  
384 second BNT162b2 mRNA vaccine dose in SARS-CoV-2-experienced individuals.  
385 MedRxiv Prepr Serv Health Sci **2021**;
- 386 24. Lustig Y, Nemet I, Kliker L, et al. Neutralizing Response against Variants after SARS-  
387 CoV-2 Infection and One Dose of BNT162b2. N Engl J Med **2021**; 0:null.
- 388 25. Ebinger JE, Fert-Bober J, Printsev I, et al. Antibody responses to the BNT162b2 mRNA  
389 vaccine in individuals previously infected with SARS-CoV-2. Nat Med **2021**;
- 390 26. Outlining the Prior Infection with SARS-CoV-2 study (PICOV) - preliminary findings on  
391 symptoms in nursing home residents and staff. 2021. Available at:  
392 <https://www.researchsquare.com>. Accessed 9 April 2021.
- 393 27. Mariën J, Ceulemans A, Michiels J, et al. Evaluating SARS-CoV-2 spike and  
394 nucleocapsid proteins as targets for antibody detection in severe and mild COVID-19  
395 cases using a Luminex bead-based assay. J Virol Methods **2021**; 288:114025.
- 396 28. Earle KA, Ambrosino DM, Fiore-Gartland A, et al. Evidence for antibody as a protective  
397 correlate for COVID-19 vaccines. medRxiv **2021**; :2021.03.17.20200246.
- 398 29. Vogel AB, Kanevsky I, Che Y, et al. BNT162b vaccines protect rhesus macaques from  
399 SARS-CoV-2. Nature **2021**; 592:283–289.
- 400 30. Corbett KS, Flynn B, Foulds KE, et al. Evaluation of the mRNA-1273 Vaccine against  
401 SARS-CoV-2 in Nonhuman Primates. N Engl J Med **2020**; 383:1544–1555.

- 402 31. McMahan K, Yu J, Mercado NB, et al. Correlates of protection against SARS-CoV-2 in  
403 rhesus macaques. *Nature* **2021**; 590:630–634.
- 404 32. Parry HM, Tut G, Faustini S, et al. BNT162b2 Vaccination in People Over 80 Years of  
405 Age Induces Strong Humoral Immune Responses with Cross Neutralisation of P.1  
406 Brazilian Variant. Rochester, NY: Social Science Research Network, 2021. Available at:  
407 <https://papers.ssrn.com/abstract=3816840>. Accessed 8 April 2021.
- 408 33. Long Q-X, Tang X-J, Shi Q-L, et al. Clinical and immunological assessment of  
409 asymptomatic SARS-CoV-2 infections. *Nat Med* **2020**; 26:1200–1204.
- 410 34. Keehner J, Horton LE, Pfeffer MA, et al. SARS-CoV-2 Infection after Vaccination in  
411 Health Care Workers in California. *N Engl J Med* **2021**; 0:null.
- 412 35. Kustin T, Harel N, Finkel U, et al. Evidence for increased breakthrough rates of SARS-  
413 CoV-2 variants of concern in BNT162b2 mRNA vaccinated individuals. *medRxiv* **2021**;  
414 :2021.04.06.21254882.
- 415 36. COVID-19 Breakthrough Case Investigations and Reporting | CDC. 2021. Available at:  
416 <https://www.cdc.gov/vaccines/covid-19/health-departments/breakthrough-cases.html>.  
417 Accessed 5 May 2021.
- 418 37. Tsang JS, Dobaño C, VanDamme P, et al. Improving Vaccine-Induced Immunity: Can  
419 Baseline Predict Outcome? *Trends Immunol* **2020**; 41:457–465.
- 420 38. Kotliarov Y, Sparks R, Martins AJ, et al. Broad immune activation underlies shared set  
421 point signatures for vaccine responsiveness in healthy individuals and disease activity  
422 in patients with lupus. *Nat Med* **2020**; 26:618–629.
- 423
- 424

425 **Table 1. Demographic Characteristics of the Participants, According to Study Group.**

|                                     | naive staff<br>(N=19) | naive resident<br>(N=20) | infected<br>staff<br>(N=21) | infected<br>resident<br>(N=20) | Total<br>(N=80) | p value |
|-------------------------------------|-----------------------|--------------------------|-----------------------------|--------------------------------|-----------------|---------|
| <b>Age, years</b>                   |                       |                          |                             |                                |                 | <0.001  |
| Mean (SD)                           | 47.9 (10.2)           | 86.0 (8.3)               | 47.6 (11.0)                 | 84.3 (7.7)                     | 66.4 (21.0)     |         |
| Range                               | 23.0 - 64.0           | 67.0 - 102.0             | 30.0 - 68.0                 | 65.0 - 94.0                    | 23.0 - 102.0    |         |
| <b>Gender</b>                       |                       |                          |                             |                                |                 | 0.66    |
| Female                              | 14 (73.7%)            | 13 (65.0%)               | 16 (76.2%)                  | 12 (60.0%)                     | 55 (68.8%)      |         |
| Male                                | 5 (26.3%)             | 7 (35.0%)                | 5 (23.8%)                   | 8 (40.0%)                      | 25 (31.2%)      |         |
| <b>Ethnicity</b>                    |                       |                          |                             |                                |                 | 0.13    |
| Caucasian                           | 17 (89.5%)            | 20 (100.0%)              | 18 (85.7%)                  | 20 (100.0%)                    | 75 (93.8%)      |         |
| Other                               | 2 (10.5%)             | 0 (0.0%)                 | 3 (14.3%)                   | 0 (0.0%)                       | 5 (6.2%)        |         |
| <b>BMI, kg/m<sup>2</sup> *</b>      |                       |                          |                             |                                |                 | 0.009   |
| Mean (SD)                           | 27.3 (5.3)            | 24.8 (6.0)               | 28.1 (5.3)                  | 22.9 (4.3)                     | 25.8 (5.6)      |         |
| Range                               | 21.2 - 36.8           | 16.7 - 36.3              | 20.1 - 44.2                 | 14.6 - 30.5                    | 14.6 - 44.2     |         |
| <b>Self-reported smoking status</b> |                       |                          |                             |                                |                 | 0.48    |
| Ex-smoker                           | 1 (5.3%)              | 1 (5.0%)                 | 3 (14.3%)                   | 5 (25.0%)                      | 10 (12.5%)      |         |
| Non-smoker                          | 16 (84.2%)            | 18 (90.0%)               | 17 (81.0%)                  | 14 (70.0%)                     | 65 (81.2%)      |         |
| Current smoker                      | 2 (10.5%)             | 1 (5.0%)                 | 1 (4.8%)                    | 1 (5.0%)                       | 5 (6.2%)        |         |
| <b>Daily exercise</b>               |                       |                          |                             |                                |                 | 0.005   |
| less than 30 minutes                | 3 (15.8%)             | 12 (60.0%)               | 2 (9.5%)                    | 10 (50.0%)                     | 27 (33.8%)      |         |
| 30 to 60 minutes                    | 6 (31.6%)             | 6 (30.0%)                | 7 (33.3%)                   | 6 (30.0%)                      | 25 (31.2%)      |         |
| at least 60 minutes                 | 9 (47.4%)             | 2 (10.0%)                | 12 (57.1%)                  | 3 (15.0%)                      | 26 (32.5%)      |         |
| None                                | 1 (5.3%)              | 0 (0.0%)                 | 0 (0.0%)                    | 1 (5.0%)                       | 2 (2.5%)        |         |
| <b>Self-reported health status</b>  |                       |                          |                             |                                |                 | <0.001  |
| Very good health                    | 9 (47.4%)             | 0 (0.0%)                 | 4 (19.0%)                   | 2 (10.0%)                      | 15 (18.8%)      |         |
| Good health                         | 10 (52.6%)            | 12 (60.0%)               | 14 (66.7%)                  | 8 (40.0%)                      | 44 (55.0%)      |         |
| Reasonable health                   | 0 (0.0%)              | 8 (40.0%)                | 2 (9.5%)                    | 9 (45.0%)                      | 19 (23.8%)      |         |
| Bad health                          | 0 (0.0%)              | 0 (0.0%)                 | 1 (4.8%)                    | 1 (5.0%)                       | 2 (2.5%)        |         |
| <b>Quality of Life index</b>        |                       |                          |                             |                                |                 | <0.001  |
| Mean (SD)                           | 0.9 (0.1)             | 0.6 (0.3)                | 0.8 (0.2)                   | 0.6 (0.2)                      | 0.7 (0.2)       |         |
| Range                               | 0.7 - 1.0             | 0.1 - 1.0                | 0.5 - 1.0                   | 0.2 - 1.0                      | 0.1 - 1.0       |         |
| <b>Medication use</b>               |                       |                          |                             |                                |                 |         |
| Cardiovascular disease              | 1 (5.3%)              | 17 (85.0%)               | 1 (4.8%)                    | 19 (95.0%)                     | 38 (47.5%)      | <0.001  |
| Hypertension                        | 2 (10.5%)             | 14 (70.0%)               | 3 (14.3%)                   | 19 (95.0%)                     | 38 (47.5%)      | <0.001  |
| Pain medication                     | 0 (0.0%)              | 15 (75.0%)               | 0 (0.0%)                    | 12 (60.0%)                     | 27 (33.8%)      | <0.001  |
| Diabetes Mellitus                   | 0 (0.0%)              | 4 (20.0%)                | 0 (0.0%)                    | 3 (15.0%)                      | 7 (8.8%)        | 0.05    |
| Anti-psychotic medication           | 0 (0.0%)              | 10 (50.0%)               | 0 (0.0%)                    | 8 (40.0%)                      | 18 (22.5%)      | <0.001  |
| Anti-depressant medication          | 0 (0.0%)              | 12 (60.0%)               | 0 (0.0%)                    | 7 (35.0%)                      | 19 (23.8%)      | <0.001  |
| Pulmonary disease                   | 0 (0.0%)              | 3 (15.0%)                | 0 (0.0%)                    | 1 (5.0%)                       | 4 (5.0%)        | 0.10    |
| Allergy                             | 0 (0.0%)              | 2 (10.0%)                | 0 (0.0%)                    | 3 (15.0%)                      | 5 (6.2%)        | 0.12    |
| Neurological disease                | 0 (0.0%)              | 4 (20.0%)                | 0 (0.0%)                    | 2 (10.0%)                      | 6 (7.5%)        | 0.05    |
| Immunological disease               | 0 (0.0%)              | 0 (0.0%)                 | 1 (4.8%)                    | 0 (0.0%)                       | 1 (1.2%)        | 0.42    |
| <b>MMSE score<sup>†</sup></b>       |                       |                          |                             |                                |                 | 0.98    |
| Mean (SD)                           | .                     | 25.6 (3.2)               | .                           | 25.9 (3.3)                     | 25.8 (3.2)      |         |
| Range                               | .                     | 19.0 - 30.0              | .                           | 18.0 - 30.0                    | 18.0 - 30.0     |         |
| <b>Frailty scale<sup>†</sup></b>    |                       |                          |                             |                                |                 |         |
| Very fit                            | .                     | 0 (0.0%)                 | .                           | 1 (5.0%)                       | 1 (2.5%)        | 0.40    |
| Fit                                 | .                     | 3 (15.0%)                | .                           | 1 (5.0%)                       | 4 (10.0%)       | 0.28    |
| Managing well                       | .                     | 5 (25.0%)                | .                           | 7 (35.0%)                      | 12 (30.0%)      | 0.87    |
| Very mild frailty                   | .                     | 3 (15.0%)                | .                           | 3 (15.0%)                      | 6 (15.0%)       | 1.00    |
| Mild frailty                        | .                     | 6 (30.0%)                | .                           | 4 (20.0%)                      | 10 (25.0%)      | 0.55    |
| Moderate frailty                    | .                     | 1 (5.0%)                 | .                           | 3 (15.0%)                      | 4 (10.0%)       | 0.47    |
| Severe frailty                      | .                     | 2 (10.0%)                | .                           | 1 (5.0%)                       | 3 (7.5%)        | 0.39    |

426 *Data are mean (SD) or n (%). Range denotes the lowest to the highest numerical observation.*

427 *\* Data available for 19, 19, 21, 20, and 79 subjects.*

428 *† Mini-mental State Examination (MMSE) and Frailty scale was only asked to residents.*

429

430



431 **Figure legends**

432

433 **Figure 1. SARS-CoV-2 Specific Binding Antibody Responses to BNT162b2 mRNA Vaccination**  
434 **in Residents and Staff of Nursing Homes.**

435 SARS-CoV-2 naïve and previously infected NH residents and staff received two doses of 30µg  
436 BNT162b2 vaccine on day 0 and day 21 (arrows). The concentration of spike-specific binding Ab was  
437 measured using a multiplex assay before vaccination and at days 21, 28 and 49 after the first dose  
438 and is shown as arbitrary pixel units per ml (AU/ml; limit of quantification, 21.0 for RBD, 19.5 for S1  
439 and S2). Each data point represents a serum sample. Statistical significance of differences between  
440 time points (**panel A**) and study groups (**panel B**) were determined by the Kruskal-Wallis test by  
441 ranks, using the Mann-Whitney U post-hoc test and Benjamini-Hochberg correction for multiple testing  
442 (\*:  $p < 0.05$ ; \*\*:  $p < 0.01$ ; \*\*\*:  $p < 0.001$ ).

443

444 **Figure 2. Low RBD IgG Avidity and Neutralizing Antibody Responses in SARS-CoV-2 Naïve**  
445 **Residents.**

446 RBD IgG avidity and neutralizing Ab responses to mRNA vaccination were measured at days 0, 21, 28  
447 and 49 in SARS-CoV-2 naïve and previously infected residents and staff. **Panels A and B.** Avidity of  
448 RBD-specific IgG ( $K_{off}$  in 1/s). 'N tested' indicates the number of participants with sufficiently high  
449 antibody concentrations for avidity testing (panel A). **Panels C/D/E.** 50% neutralizing Ab titers of  
450 SARS-CoV-2 wild type (WT) and B.1351 variant (lower limit of quantification, LLOQ, 1/50). 'N > LLOQ'  
451 indicates the number of participants with detectable neutralizing Ab (panel C). Black bars indicate  
452 median values. Statistical significance of differences between time points and study groups were  
453 determined by the Kruskal-Wallis test by ranks, using the Mann-Whitney U post-hoc test and  
454 Benjamini-Hochberg correction for multiple testing (\*:  $p < 0.05$ ; \*\*:  $p < 0.01$ ; \*\*\*:  $p < 0.001$ ). For differences  
455 between wild type and the B.1.351 variant the Mann-Whitney test was used. **Panel F.** Spearman's  
456 rank correlation coefficients ( $\rho$ ) between titers of neutralizing Ab to WT strain and the other Ab  
457 response parameters. Data below or above limits of quantification were excluded (gray dots).

458

459 **Figure 3. Low Vaccine Responders Include both SARS-CoV-2 Naïve Nursing Home Residents**  
460 **and Staff.**

461 **Panel A.** Clustering (UMAP) analysis of all study participants with available RBD/S1/S2 binding IgG  
462 Ab concentrations, RBD-IgG avidity and SARS-CoV-2 wild type neutralization at day 49. The position  
463 of individual participants in variable space 1 and 2 indicates similarities or differences in Ab responses.  
464 DBSCAN was used to identify clusters. **Panels B/C/D.** Clusters 1 to 5 are plotted against the RBD  
465 binding IgG, RBD IgG avidity and WT neutralizing titers, respectively. **Panel E.** Age of participants  
466 included in clusters of antibody responses. Black bars indicate median values.

**a** Figure 1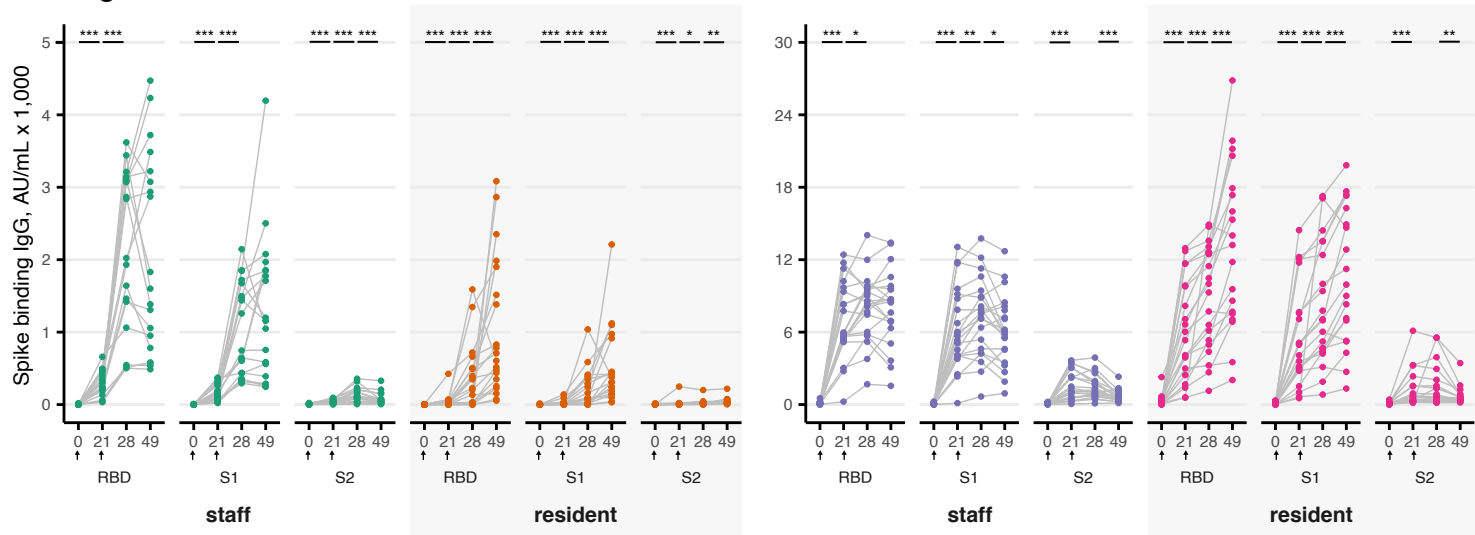**b**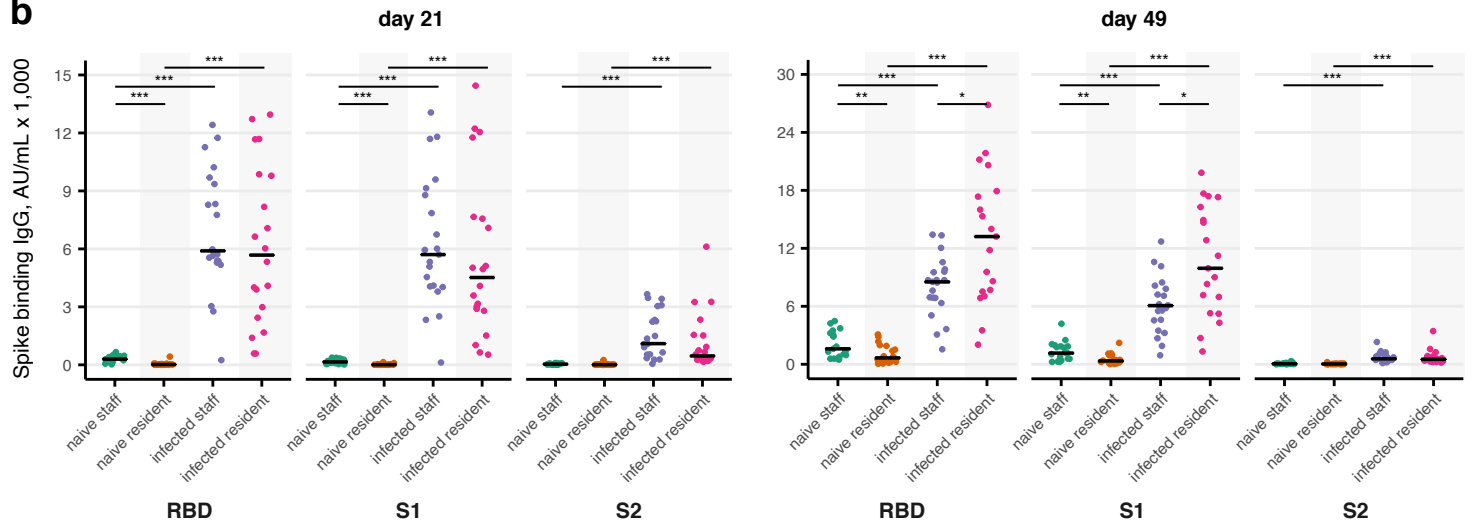

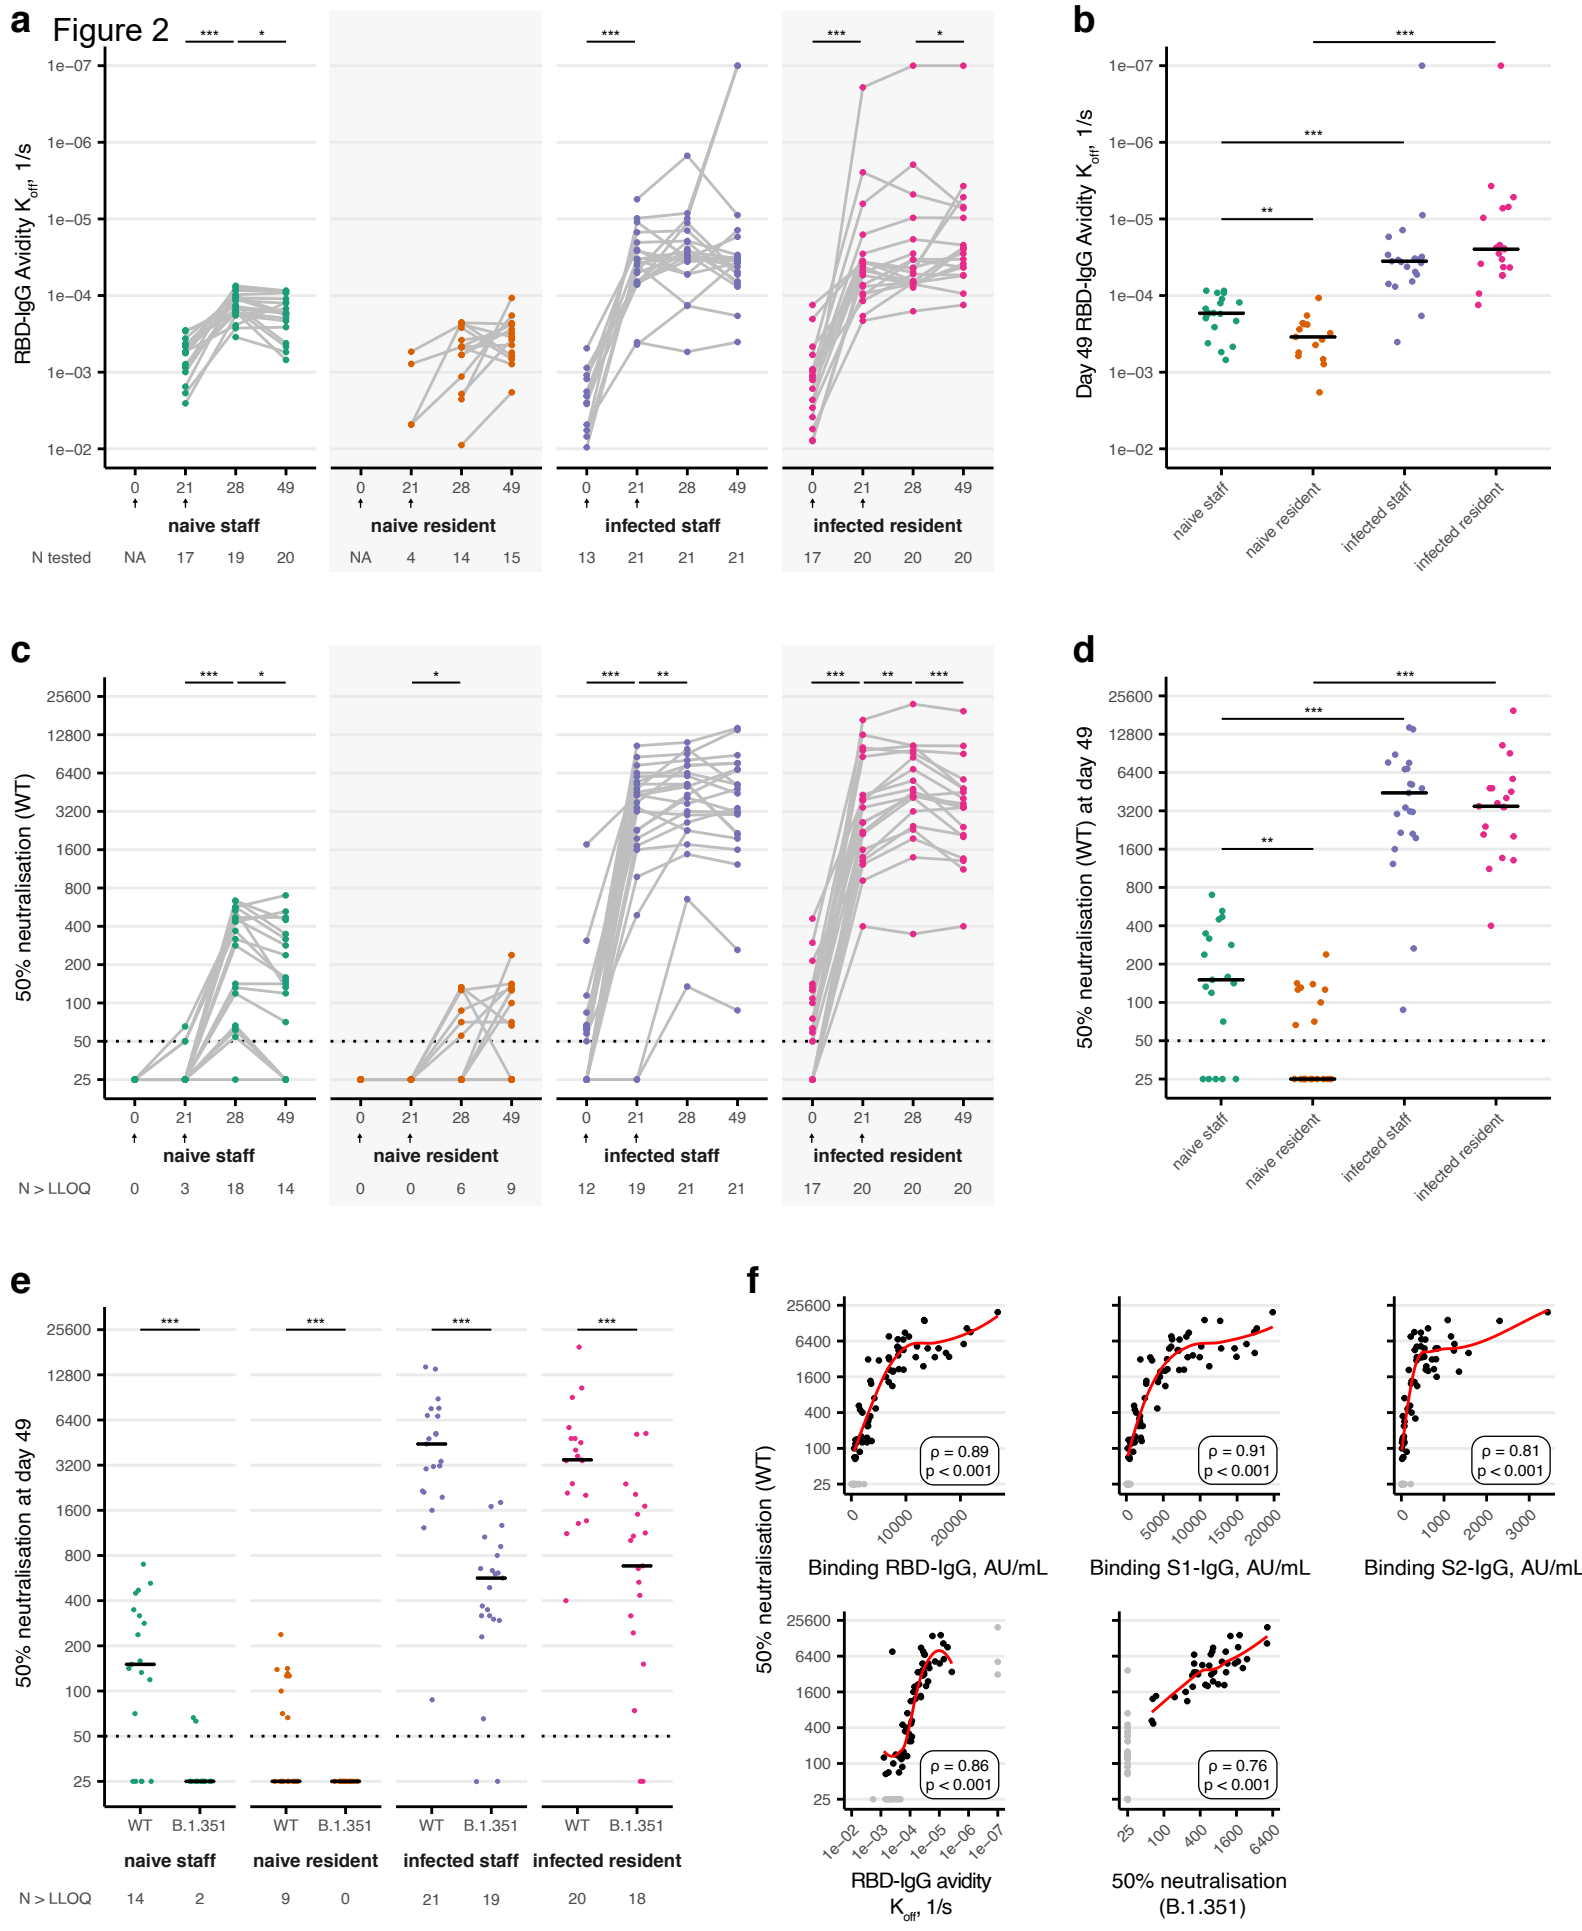

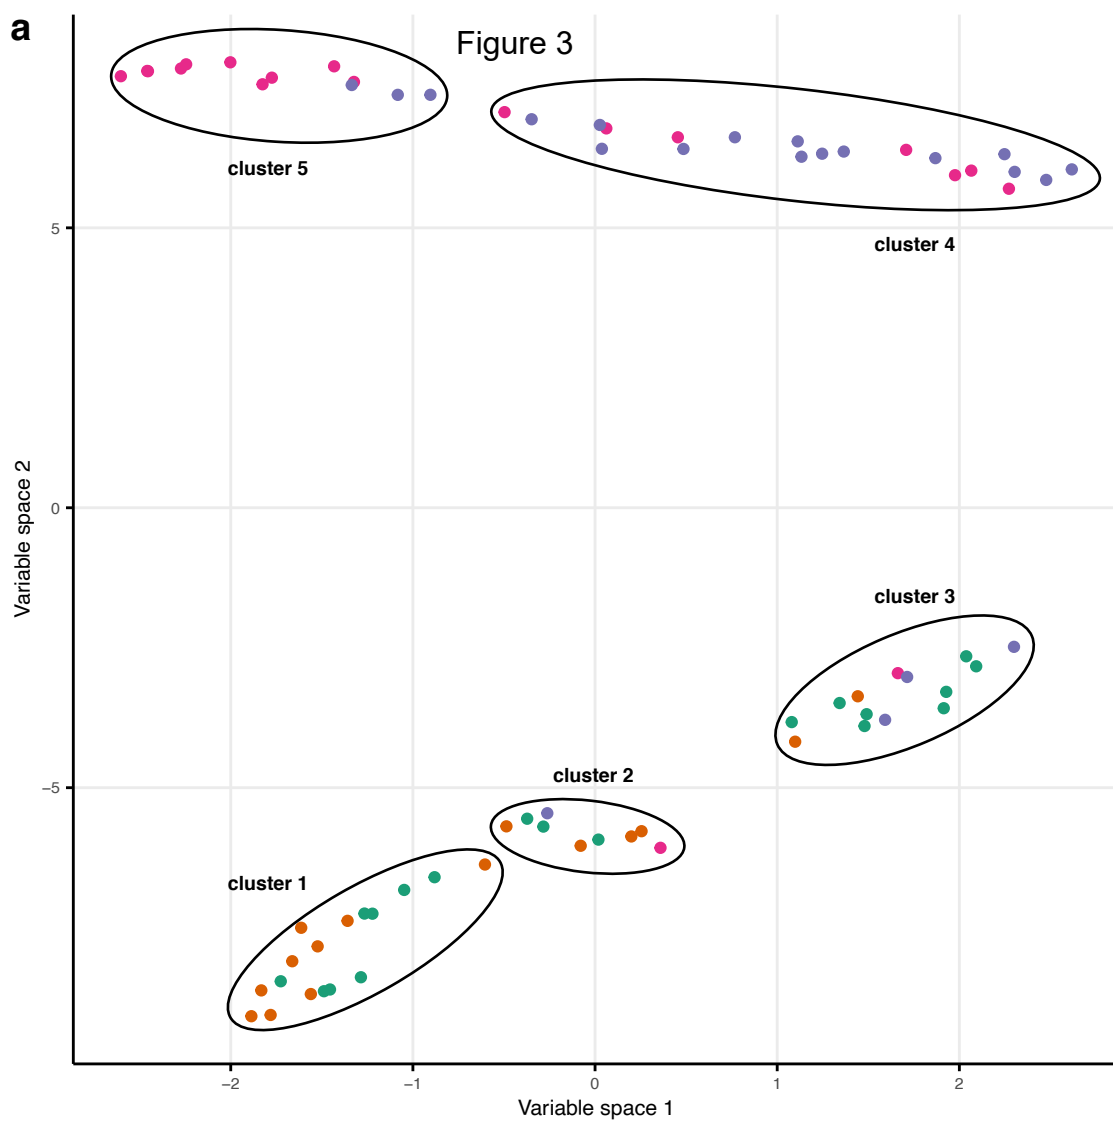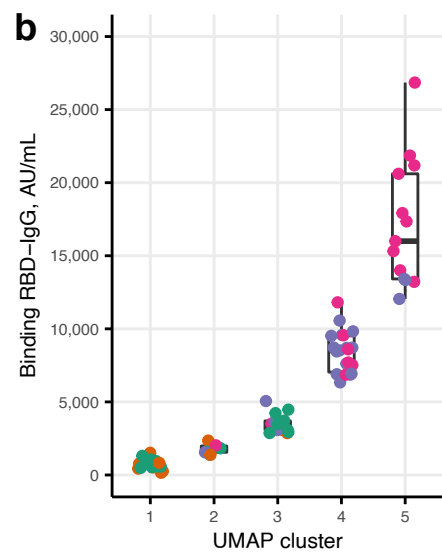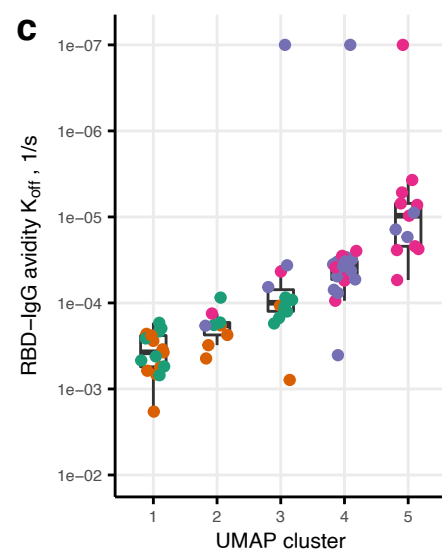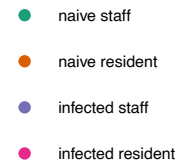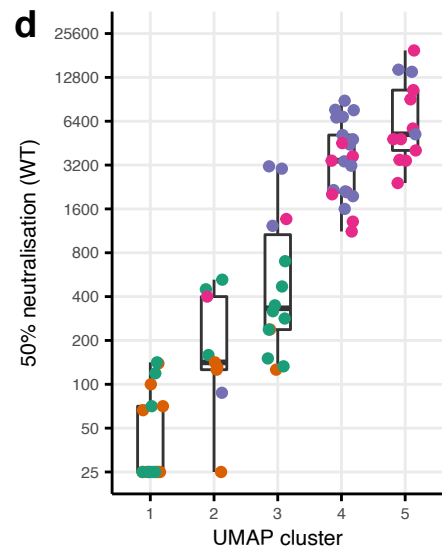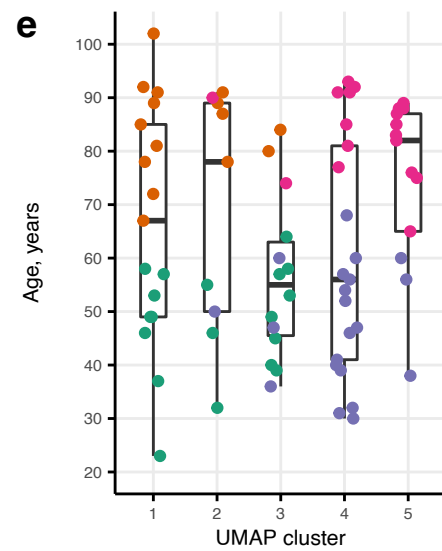

Source: https://medrxiv.org/content/10.1101/2021.06.08.21258366v1.full.pdf
